# Supplementary material for: Stabilization of oxidovanadium(iv) by organic radicals
Source: Royal Society of Chemistry journal article supplement (doi:10.1039/c2dt32693k), 2013-01-01
Supplement: c2dt32693k.pdf [file c2dt32693k.pdf]

## Supporting Information

### Stabilization of Oxidovanadium(IV) by Organic Radicals

Suman Kundu,<sup>a</sup> Suvendu Maity,<sup>a</sup> Amarendra Nath Maity,<sup>b</sup> Shyue-Chu Ke,<sup>b</sup> and Prasanta Ghosh<sup>\*a</sup>

Chart S2 Isolated  $[(L_1^{R^-})(VO^{2+})(L^{R'_{IS} \cdot -})]$  complexes.

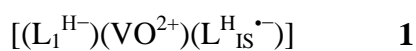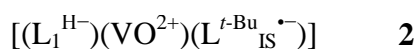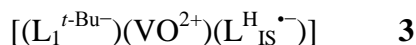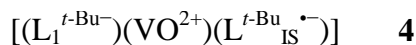

Chart S3 Electronic states of the de-protonated  $L^{R'}H_2$  coordinated to oxidovanadium (IV/V) ions.

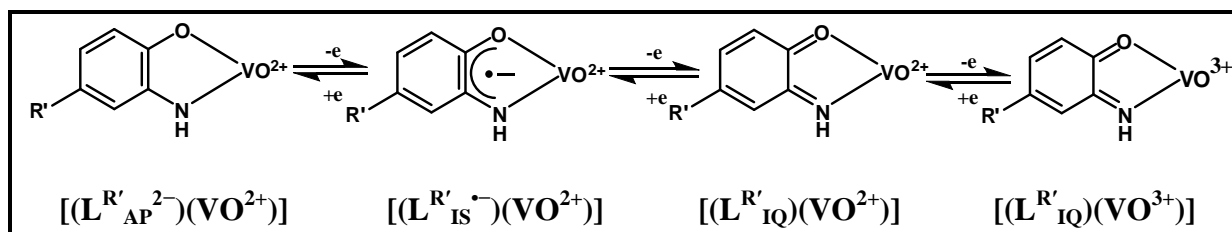

Chart S4 Calculated average V(1)–N(1) and V(1)–O(2) lengths (Å) of **1** and **2** and their redox series.

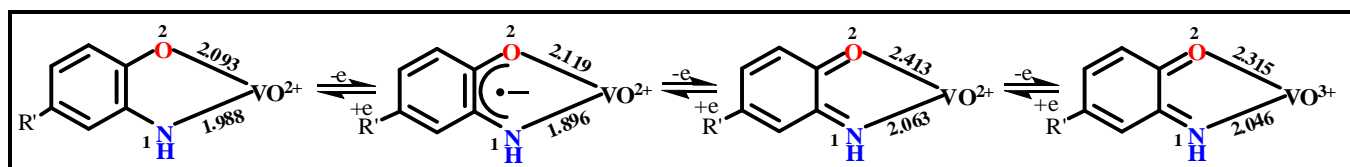

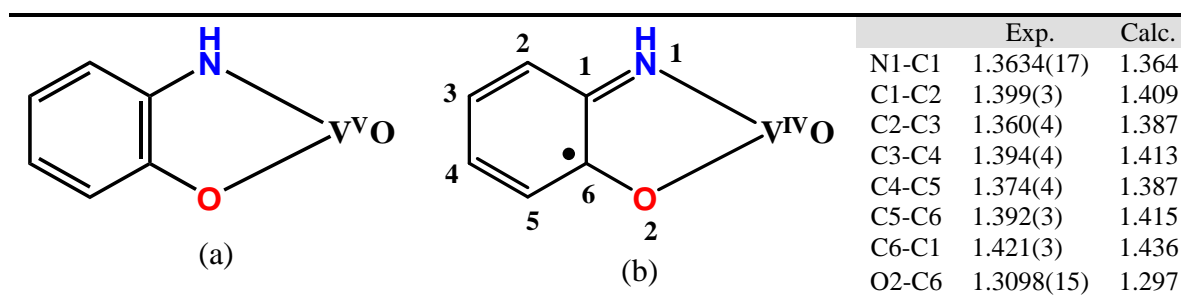

**Fig. S1** (a)  $L_{AP}^{H,2-}$  coordination to  $[VO]^{3+}$  ion (Type I state) (b)  $L_{IS}^{H,2-}$  coordination to  $[VO]^{2+}$  ion (Type III state). Experimental and calculated (in parentheses) bond lengths (Å) of the fragment respectively in **1** and BS(1,1)  $M_s = 0$  state of **1**.

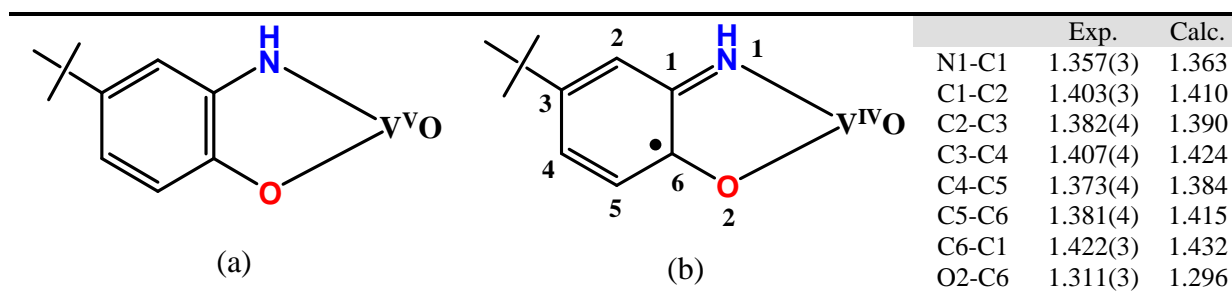

**Fig. S2** (a)  $L_{AP}^{t-Bu,2-}$  coordinated to  $[VO]^{3+}$  (Type I coordination) (b)  $L_{IS}^{t-Bu,2-}$  coordinated to  $[VO]^{2+}$  (Type III coordination). Experimental and calculated bond lengths (Å) of the fragment, respectively, in **2** and BS(1,1)  $M_s = 0$  state of **2**.

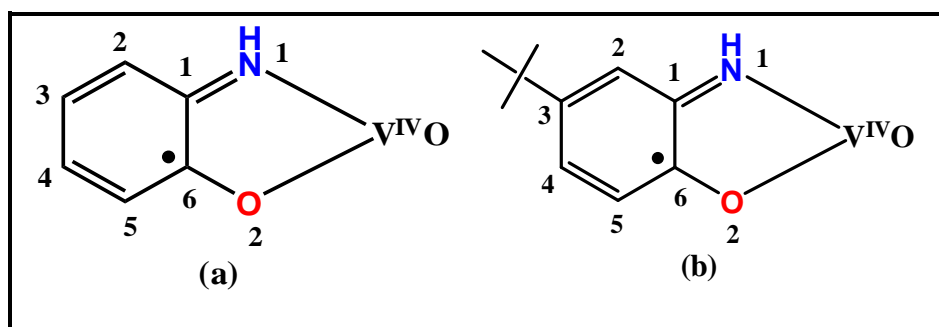

**Fig. S3** (a) Coordination of  $L_{IS}^{H,2-}$  to  $[VO]^{2+}$  (Type III state) in **3** (bond lengths of the NO-chelate: C(1)-N(1), 1.358(4); C(6)-O(2), 1.314(4); C(1)-C(6), 1.418(5) Å) and (b) Coordination of  $L_{IS}^{t-Bu,2-}$  to  $[VO]^{2+}$  (Type III state) in **4** (bond lengths of the NO-chelate: C(1)-N(1), 1.359(3); C(6)-O(2), 1.312(3); C(1)-C(6), 1.412(3) Å).

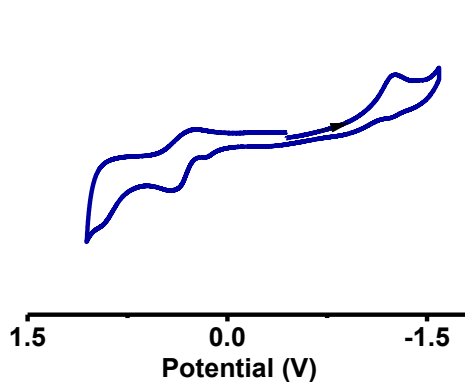

Cyclic voltammogram of **1** in CH<sub>2</sub>Cl<sub>2</sub> at 298 K. Conditions: 0.2 M [N(*n*-Bu)<sub>4</sub>]PF<sub>6</sub> supporting electrolyte; scan rate, 100 mV s<sup>-1</sup>; platinum working electrode.

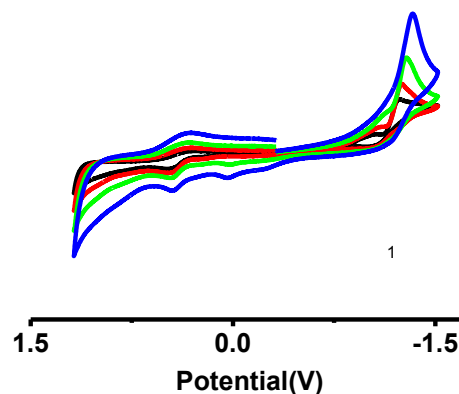

Cyclic voltammograms of **1** in CH<sub>2</sub>Cl<sub>2</sub> at 298 K. Conditions: 0.2 M [N(*n*-Bu)<sub>4</sub>]PF<sub>6</sub> supporting electrolyte; scan rate, 50, 100, 200, 400 mV s<sup>-1</sup>; platinum working electrode.

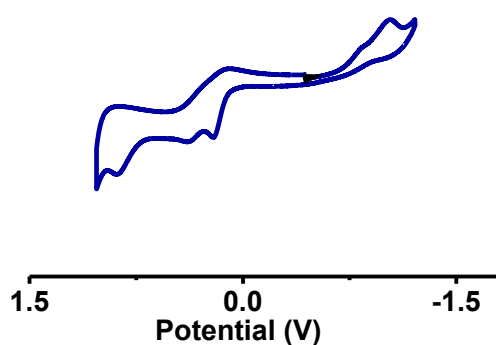

Cyclic voltammogram of **2** in CH<sub>2</sub>Cl<sub>2</sub> at 298 K. Conditions: 0.2 M [N(*n*-Bu)<sub>4</sub>]PF<sub>6</sub> supporting electrolyte; scan rate, 100 mV s<sup>-1</sup>; platinum working electrode.

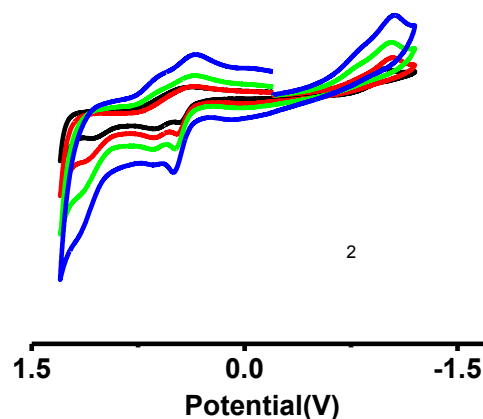

Cyclic voltammograms of **2** in CH<sub>2</sub>Cl<sub>2</sub> at 298 K. Conditions: 0.2 M [N(*n*-Bu)<sub>4</sub>]PF<sub>6</sub> supporting electrolyte; scan rate, 50, 100, 200, 400 mV s<sup>-1</sup>; platinum working electrode.

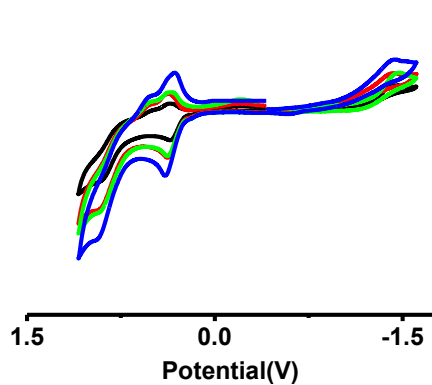

Cyclic voltammograms of **3** in CH<sub>2</sub>Cl<sub>2</sub> at 298 K. Conditions: 0.2 M [N(*n*-Bu)<sub>4</sub>]PF<sub>6</sub> supporting electrolyte; scan rate, 50, 100, 200, 400 mv s<sup>-1</sup>; platinum working electrode.

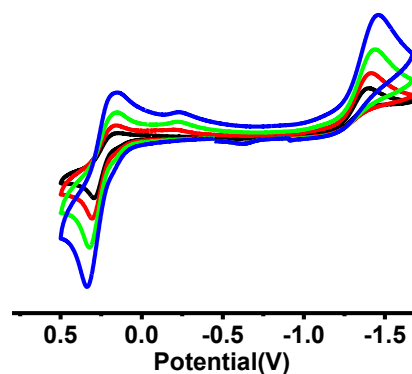

Cyclic voltammograms of **3** in CH<sub>2</sub>Cl<sub>2</sub> at 298 K. Conditions: 0.2 M [N(*n*-Bu)<sub>4</sub>]PF<sub>6</sub> supporting electrolyte; scan rate, 50, 100, 200, 400 mv s<sup>-1</sup> at first oxidation; platinum working electrode.

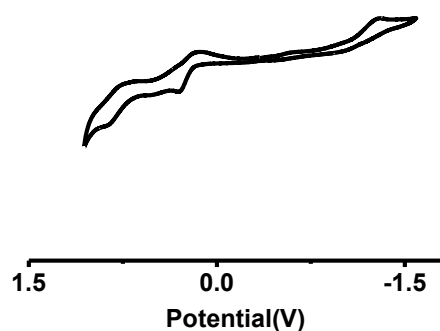

Cyclic voltammogram of **4** in CH<sub>2</sub>Cl<sub>2</sub> at 298 K. Conditions: 0.2 M [N(*n*-Bu)<sub>4</sub>]PF<sub>6</sub> supporting electrolyte; scan rate, 100 mv s<sup>-1</sup>; platinum working electrode.

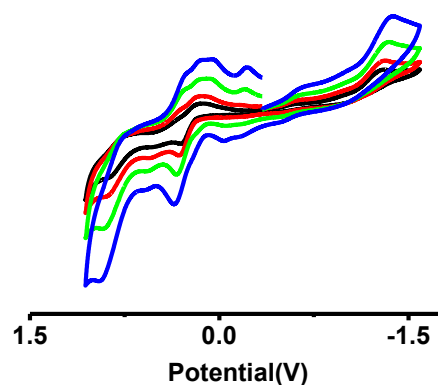

Cyclic voltammograms of **4** in CH<sub>2</sub>Cl<sub>2</sub> at 298 K. Conditions: 0.2 M [N(*n*-Bu)<sub>4</sub>]PF<sub>6</sub> supporting electrolyte; scan rate, 50, 100, 200, 400 mv s<sup>-1</sup>; platinum working electrode.

**Fig. S4** Cyclic voltammograms of **1-4** complexes in CH<sub>2</sub>Cl<sub>2</sub> at 298 K.

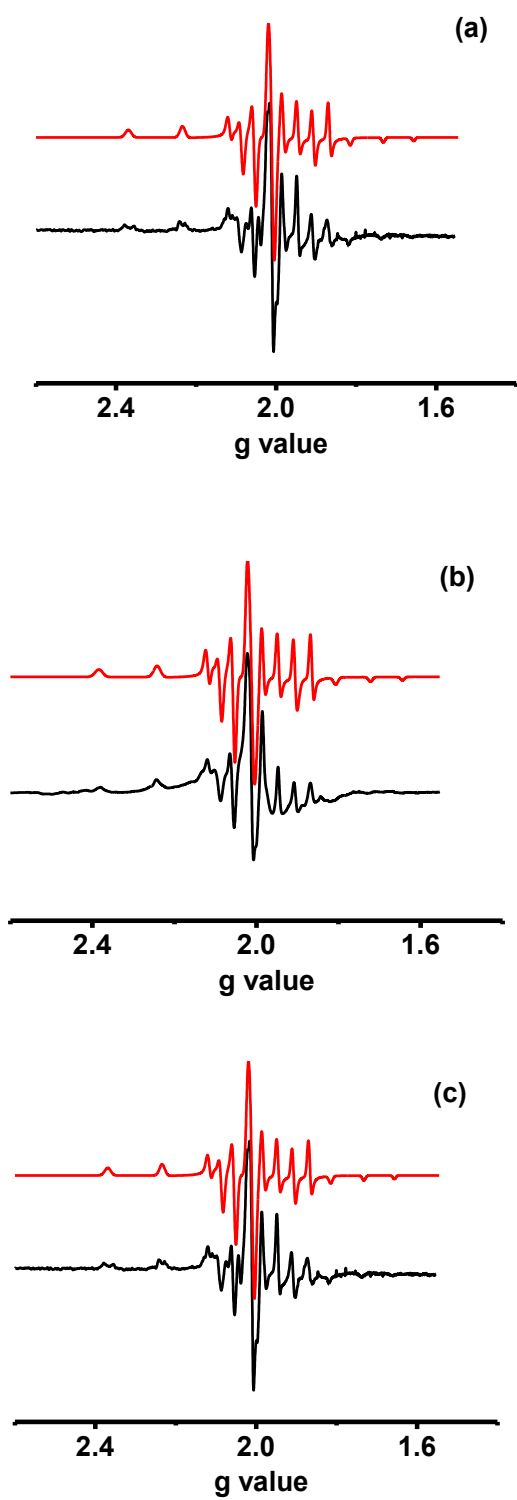

**Fig. S5** X-band EPR spectra of the frozen  $\text{CH}_2\text{Cl}_2$  glasses of (a)  $[1]^+$ , (b)  $[2]^+$  and (c)  $[3]^+$  at 78 K (black, experimental; red, simulated).

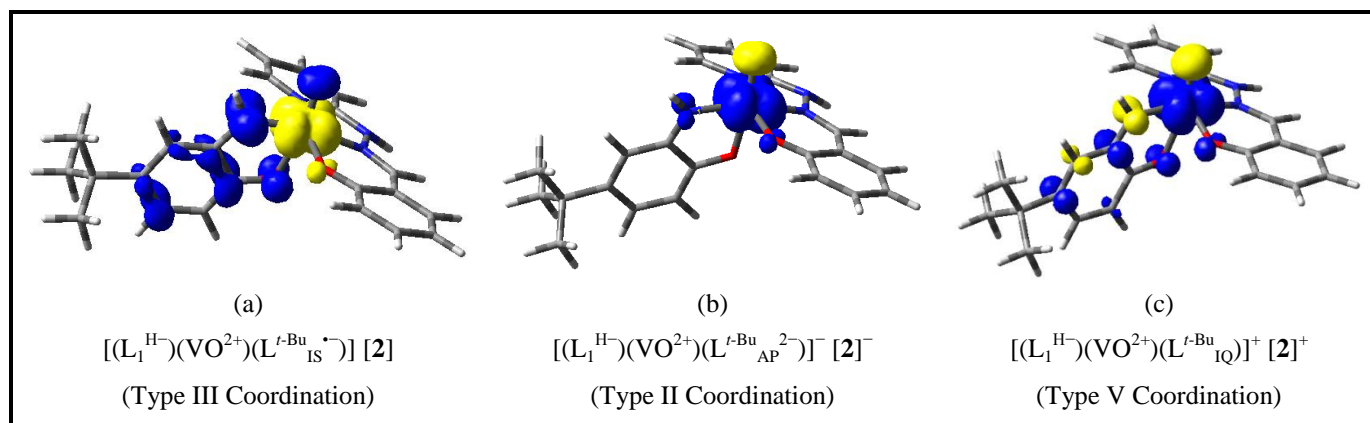

**Fig. S6** Spin density plot of **2**,  $[2]^-$  and  $[2]^+$  (blue,  $\alpha$  spin; yellow,  $\beta$  spin) and values from Mulliken spin population analyses (spin density, **2**: V -0.77, N1 0.27, O1 0.11, O2 0.12, O3 -0.02, C4 0.11, C6 0.10;  $[2]^-$ : V 1.05, O1 -0.13, O3 0.02, N1 0.04, C2 0.03;  $[2]^+$ : V 1.00, O1 -0.15, O2 0.06, O3 0.03, N1 -0.10, C1 0.10, C2 -0.07, C3 0.10, C4 -0.03, C5 0.04).

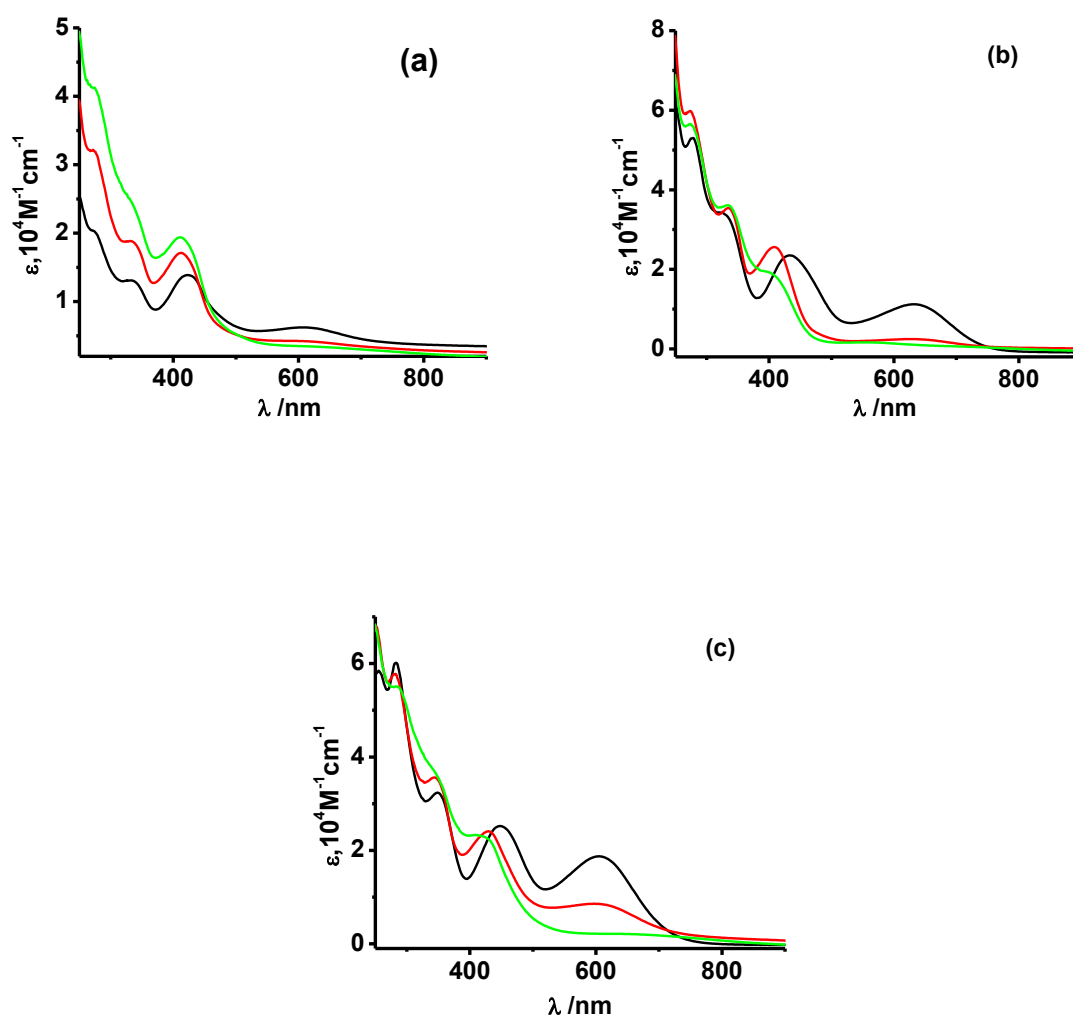

**Fig. S7** Electronic absorption spectra of (a) electrogenerated  $[1]^{2+}$  (green),  $[1]^+$  (red) ions and **1** (black), (b) electrogenerated  $[2]^{2+}$  (green),  $[2]^+$  (red) ions and **2** (black), (c) electrogenerated  $[3]^{2+}$  (green),  $[3]^+$  (red) ions and **3** (black) in  $CH_2Cl_2$  at 298 K.

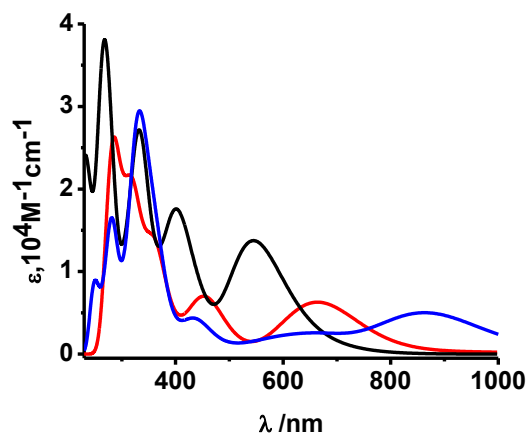

Fig. S8 Electronic absorption spectra of **2** (black),  $[2]^+$  (red) and  $[2]^{2+}$  (blue) obtained from TD-DFT calculations in  $\text{CH}_2\text{Cl}_2$ .

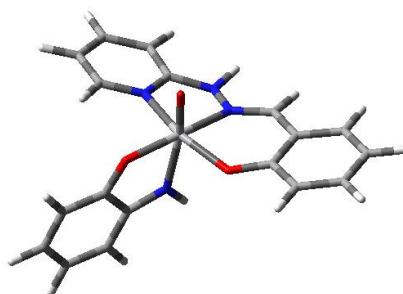

Fig. S9 Gas phase optimised geometry of  $1^{t\text{-NH}}$ .

Table S1 Selected experimental bond lengths (Å) and angles (°) of **2** and calculated bond parameters of **2**,  $[2]^+$ ,  $[2]^{2+}$  and  $[2]^-$  using B3LYP, B3PW91, and PBE1PBE functionals

|                | Exp.       | Calc.                  |                        |                        |             |               |             |               |
|----------------|------------|------------------------|------------------------|------------------------|-------------|---------------|-------------|---------------|
|                |            | <b>2</b>               |                        |                        |             | $[2]^+$       | $[2]^{2+}$  | $[2]^-$       |
|                | <b>2</b>   | BS(1,1)<br>$M_s = 0^a$ | BS(1,1)<br>$M_s = 0^b$ | BS(1,1)<br>$M_s = 0^c$ | $M_s = 1^a$ | $M_s = 1/2^a$ | $M_s = 0^a$ | $M_s = 1/2^a$ |
| V(1)-O(1)      | 1.5968(18) | 1.599                  | 1.594                  | 1.588                  | 1.598       | 1.582         | 1.567       | 1.621         |
| V(1)-O(2)      | 2.1505(17) | 2.122                  | 2.096                  | 2.089                  | 2.240       | 2.420         | 2.327       | 2.096         |
| V(1)-O(3)      | 1.9244(17) | 1.912                  | 1.899                  | 1.894                  | 1.927       | 1.886         | 1.778       | 1.995         |
| V(1)-N(1)      | 1.924(2)   | 1.897                  | 1.884                  | 1.876                  | 2.075       | 2.068         | 2.034       | 1.989         |
| V(1)-N(2)      | 2.118(2)   | 2.144                  | 2.126                  | 2.119                  | 2.181       | 2.133         | 2.100       | 2.222         |
| V(1)-N(4)      | 2.1126(18) | 2.156                  | 2.144                  | 2.138                  | 2.095       | 2.083         | 2.097       | 2.139         |
| O(2)-C(6)      | 1.311(3)   | 1.296                  | 1.294                  | 1.292                  | 1.279       | 1.237         | 1.239       | 1.318         |
| N(1)-C(1)      | 1.357(3)   | 1.363                  | 1.362                  | 1.360                  | 1.333       | 1.301         | 1.308       | 1.369         |
| O(3)-C(22)     | 1.324(3)   | 1.303                  | 1.299                  | 1.297                  | 1.304       | 1.321         | 1.329       | 1.287         |
| C(1)-C(2)      | 1.403(3)   | 1.410                  | 1.407                  | 1.405                  | 1.425       | 1.438         | 1.422       | 1.405         |
| C(2)-C(3)      | 1.382(4)   | 1.390                  | 1.3899                 | 1.388                  | 1.382       | 1.365         | 1.374       | 1.409         |
| C(3)-C(4)      | 1.407(4)   | 1.424                  | 1.419                  | 1.417                  | 1.436       | 1.473         | 1.483       | 1.404         |
| C(4)-C(5)      | 1.373(4)   | 1.384                  | 1.384                  | 1.382                  | 1.377       | 1.355         | 1.354       | 1.403         |
| C(5)-C(6)      | 1.381(4)   | 1.415                  | 1.411                  | 1.410                  | 1.424       | 1.449         | 1.444       | 1.401         |
| C(6)-C(1)      | 1.422(3)   | 1.432                  | 1.428                  | 1.425                  | 1.467       | 1.512         | 1.519       | 1.437         |
| N(3)-N(4)      | 1.376(3)   | 1.377                  | 1.366                  | 1.362                  | 1.380       | 1.377         | 1.372       | 1.381         |
| O(1)-V(1)-O(2) | 168.65(8)  | 166.76                 | 166.60                 | 166.75                 | 166.97      | 164.31        | 163.07      | 167.85        |

|                                                                |           |        |        |        |        |        |        |        |
|----------------------------------------------------------------|-----------|--------|--------|--------|--------|--------|--------|--------|
| O(1)-V(1)-N(1)                                                 | 95.86(9)  | 92.85  | 92.44  | 92.54  | 98.33  | 94.89  | 93.14  | 100.06 |
| O(2)-V(1)-N(1)                                                 | 75.86(8)  | 76.55  | 76.80  | 76.97  | 74.48  | 70.76  | 72.09  | 77.32  |
| O(1)-V(1)-O(3)                                                 | 101.93(9) | 101.73 | 101.47 | 101.57 | 104.06 | 106.57 | 102.90 | 100.09 |
| <sup>a</sup> B3LYP. <sup>b</sup> B3PW91. <sup>c</sup> PBE1PBE. |           |        |        |        |        |        |        |        |

**Table S2** Selected experimental bond lengths (Å) and angles (deg) of **3** and **4**

|               | <b>3</b> | <b>4</b>   |                | <b>3</b>   | <b>4</b>  |
|---------------|----------|------------|----------------|------------|-----------|
| V(1)-O(1)     | 1.601(3) | 1.5985(17) | C(2)-C(3)      | 1.357(6)   | 1.367(4)  |
| V(1)-O(2)     | 2.167(3) | 2.1532(17) | C(3)-C(4)      | 1.388(6)   | 1.410(4)  |
| V(1)-O(3)     | 1.905(3) | 1.9257(17) | C(4)-C(5)      | 1.392(6)   | 1.372(4)  |
| V(1)-N(1)     | 1.906(3) | 1.913(2)   | C(5)-C(6)      | 1.391(5)   | 1.391(3)  |
| V(1)-N(2)     | 2.128(3) | 2.143(3)   | C(6)-C(1)      | 1.418(5)   | 1.412(3)  |
| V(1)-N(4)     | 2.096(3) | 2.0992(19) | N(3)-N(4)      | 1.373(4)   | 1.379(2)  |
| O(2)-C(6)     | 1.314(4) | 1.312(3)   | O(1)-V(1)-O(2) | 170.54(11) | 167.87(8) |
| N(1)-C(1)     | 1.358(4) | 1.359(3)   | O(1)-V(1)-N(1) | 95.07(14)  | 92.19(9)  |
| O(3)-C(18/22) | 1.322(4) | 1.319(3)   | O(2)-V(1)-N(1) | 75.79(12)  | 75.71(7)  |
| C(1)-C(2)     | 1.401(5) | 1.406(3)   | O(1)-V(1)-O(3) | 102.65(13) | 99.77(9)  |

**Table S3** Excitation energies ( $\lambda$ /nm), oscillator strengths ( $f$ ), transition types and dominant contributions of UV-vis/NIR absorption bands of **1**, **2**, **[1]<sup>+</sup>**, **[2]<sup>+</sup>**, **[1]<sup>2+</sup>** and **[2]<sup>2+</sup>** obtained from TD-DFT calculations

| $\lambda_{\text{cal}}$                                                                          | $f$   | $\lambda_{\text{exp}}$ | Significant Transitions (>10%)                                                                                                                                                                                                                                   | Dominant Contributions    |
|-------------------------------------------------------------------------------------------------|-------|------------------------|------------------------------------------------------------------------------------------------------------------------------------------------------------------------------------------------------------------------------------------------------------------|---------------------------|
| <b>1</b> (corresponds to experimental data of <b>1-4</b> complexes, Table 2)                    |       |                        |                                                                                                                                                                                                                                                                  |                           |
| 662                                                                                             | 0.012 |                        | $H_{[\text{AP}(67)+\text{dV}(25)]} \rightarrow L+1_{[\text{L1}(23)+\text{dV}(75)]}$ (60)<br>$H_{[\text{AP}(67)+\text{dV}(25)]} \rightarrow L_{[\text{AP}(40)+\text{dV}(51)]}$ (15)                                                                               | LMCT<br>CSS-OSS CT        |
| 583                                                                                             | 0.05  | 608                    | $H_{[\text{AP}(67)+\text{dV}(25)]} \rightarrow L+2_{[\text{dV}(80)+\text{L1}(18)]}$ (52)<br>$H_{[\text{AP}(67)+\text{dV}(25)]} \rightarrow L_{[\text{AP}(40)+\text{dV}(51)]}$ (23)                                                                               | LMCT<br>CSS-OSS CT        |
| 545                                                                                             | 0.03  |                        | $H-1_{[\text{L1}(93)]} \rightarrow L_{[\text{AP}(40)+\text{dV}(51)]}$ (23)<br>$H_{[\text{AP}(67)+\text{dV}(25)]} \rightarrow L+2_{[\text{dV}(80)+\text{L1}(18)]}$ (19)                                                                                           | LMCT+LLCT<br>LMCT         |
| 518                                                                                             | 0.12  |                        | $H-1_{[\text{L1}(93)]} \rightarrow L_{[\text{AP}(40)+\text{dV}(51)]}$ (37)<br>$H_{[\text{AP}(67)+\text{dV}(25)]} \rightarrow L_{[\text{AP}(40)+\text{dV}(51)]}$ (18)<br>$H_{[\text{AP}(67)+\text{dV}(25)]} \rightarrow L+2_{[\text{dV}(80)+\text{L1}(18)]}$ (18) | LMCT+LLCT<br>LMCT<br>LMCT |
| 439                                                                                             | 0.07  | 424                    | $H-1_{[\text{L1}(93)]} \rightarrow L+1_{[\text{L1}(23)+\text{dV}(75)]}$ (82)                                                                                                                                                                                     | LMCT                      |
| 400                                                                                             | 0.18  |                        | $H-2_{[\text{AP}(93)]} \rightarrow L_{[\text{AP}(40)+\text{dV}(51)]}$ (71)                                                                                                                                                                                       | LMCT                      |
| <b>[1]<sup>+</sup></b> (corresponds to experimental data of <b>[1-4]<sup>+</sup></b> , Table 7) |       |                        |                                                                                                                                                                                                                                                                  |                           |
| 726                                                                                             | 0.04  |                        | $\alpha H-1_{[\text{L1}(96)]} \rightarrow L_{[\text{AP}(83)+\text{dV}(15)]}$ (57)<br>$\alpha H-2_{[\text{dV}(72)]} \rightarrow L_{[\text{AP}(83)+\text{dV}(15)]}$ (18)                                                                                           | LLCT<br>MLCT              |
| 686                                                                                             | 0.04  |                        | $\alpha H-2_{[\text{dV}(72)]} \rightarrow L_{[\text{AP}(83)+\text{dV}(15)]}$ (49)<br>$\alpha H-1_{[\text{L1}(96)]} \rightarrow L_{[\text{AP}(83)+\text{dV}(15)]}$ (35)                                                                                           | MLCT<br>LLCT              |



|                                                                                                   |      |     |                                                                                                                                                                                                                            |                                |
|---------------------------------------------------------------------------------------------------|------|-----|----------------------------------------------------------------------------------------------------------------------------------------------------------------------------------------------------------------------------|--------------------------------|
| 635                                                                                               | 0.02 | 610 | $\alpha$ H-2 <sub>[dV(72)]</sub> → L+1 <sub>[dV(50)+L1(48)]</sub> (49)<br>$\alpha$ H-2 <sub>[dV(72)]</sub> → L+2 <sub>[dV(80)+L1(18)]</sub> (18)<br>$\alpha$ H-2 <sub>[dV(72)]</sub> → L+3 <sub>[L1(54)+dV(46)]</sub> (12) | d-d<br>d-d<br>d-d              |
| 487                                                                                               | 0.02 |     | $\alpha$ H-4 <sub>[AP(55)+L1(45)]</sub> → L <sub>[AP(83)+dV(15)]</sub> (21)<br>$\alpha$ H-3 <sub>[AP(55)+L1(40)]</sub> → L <sub>[AP(83)+dV(15)]</sub> (29)<br>$\beta$ H-2 <sub>[AP(96)]</sub> → L <sub>[AP(92)]</sub> (31) | ILCT+LLCT<br>ILCT+LLCT<br>ILCT |
| 455                                                                                               | 0.07 |     | $\alpha$ H <sub>[L1(95)]</sub> → L+1 <sub>[dV(50)+L1(48)]</sub> (40)<br>$\beta$ H <sub>[L1(95)]</sub> → L+1 <sub>[dV(50)+L1(48)]</sub> (38)                                                                                | LMCT+ILCT<br>LMCT+ILCT         |
| 413                                                                                               | 0.01 | 413 | $\alpha$ H <sub>[L1(95)]</sub> → L+2 <sub>[dV(80)+L1(18)]</sub> (21)<br>$\beta$ H-4 <sub>[L1(78)+dV(12)]</sub> → L <sub>[AP(92)]</sub> (64)                                                                                | LMCT<br>LLCT                   |
| <b>[1]<sup>2+</sup></b> (corresponds to experimental data of <b>[1-4]<sup>2+</sup></b> , Table 7) |      |     |                                                                                                                                                                                                                            |                                |
| 856                                                                                               | 0.09 |     | H-1 <sub>[L1(87)]</sub> → L <sub>[AP(55)+dV(50)]</sub> (78)                                                                                                                                                                | LLCT+LMCT                      |
| 679                                                                                               | 0.01 |     | H-2 <sub>[AP(98)]</sub> → L <sub>[AP(55)+dV(50)]</sub> (82)                                                                                                                                                                | ILCT+LMCT                      |
| 595                                                                                               | 0.03 | 640 | H-3 <sub>[L1(96)]</sub> → L <sub>[AP(55)+dV(50)]</sub> (50)<br>H <sub>[L1(92)]</sub> → L+2 <sub>[dV(71)+L1(25)]</sub> (40)                                                                                                 | LLCT+LMCT<br>LMCT+ILCT         |
| 535                                                                                               | 0.01 |     | H-1 <sub>[L1(87)]</sub> → L+1 <sub>[AP(45)+dV(50)]</sub> (82)                                                                                                                                                              | LLCT+LMCT                      |
| 471                                                                                               | 0.01 |     | H-5 <sub>[AP(70)+L1(20)]</sub> → L <sub>[AP(55)+dV(50)]</sub> (65)<br>H-4 <sub>[L1(93)]</sub> → L <sub>[AP(55)+dV(50)]</sub> (25)                                                                                          | ILCT+LMCT<br>LLCT+LMCT         |
| 446                                                                                               | 0.03 |     | H-1 <sub>[L1(87)]</sub> → L+2 <sub>[dV(71)+L1(25)]</sub> (75)                                                                                                                                                              | LMCT+ILCT                      |
| 436                                                                                               | 0.03 |     | H-5 <sub>[AP(70)+L1(20)]</sub> → L <sub>[AP(55)+dV(50)]</sub> (22)<br>H-4 <sub>[L1(93)]</sub> → L <sub>[AP(55)+dV(50)]</sub> (62)                                                                                          | ILCT+LMCT<br>LLCT+LMCT         |
| 424                                                                                               | 0.04 | 410 | H-2 <sub>[AP(98)]</sub> → L+1 <sub>[AP(45)+dV(50)]</sub> (83)                                                                                                                                                              | ILCT+LMCT                      |
| <b>2</b> (corresponds to experimental data of <b>1-4</b> complexes, Table 2)                      |      |     |                                                                                                                                                                                                                            |                                |
| 597                                                                                               | 0.06 | 634 | H <sub>[AP(67)+dV(25)]</sub> → L <sub>[AP(41)+dV(50)]</sub> (22)<br>H <sub>[AP(67)+dV(25)]</sub> → L+2 <sub>[dV(83)]</sub> (56)                                                                                            | CSS-OSS CT<br>LMCT             |
| 548                                                                                               | 0.10 |     | H <sub>[AP(67)+dV(25)]</sub> → L <sub>[AP(41)+dV(50)]</sub> (20)<br>H <sub>[AP(67)+dV(25)]</sub> → L+2 <sub>[dV(83)]</sub> (24)<br>H-1 <sub>[L1(93)]</sub> → L <sub>[AP(41)+dV(50)]</sub> (31)                             | CSS-OSS CT<br>LMCT<br>LMCT     |
| 521                                                                                               | 0.09 |     | H-1 <sub>[L1(93)]</sub> → L <sub>[AP(41)+dV(50)]</sub> (66)                                                                                                                                                                | LMCT                           |
| 436                                                                                               | 0.07 | 440 | H-1 <sub>[L1(93)]</sub> → L+1 <sub>[L1(76)+dV(22)]</sub> (83)                                                                                                                                                              | LMCT                           |
| 401                                                                                               | 0.17 |     | H-2 <sub>[AP(93)]</sub> → L <sub>[AP(41)+dV(50)]</sub> (62)                                                                                                                                                                | LMCT                           |
| <b>[2]<sup>+</sup></b> (corresponds to experimental data of <b>[1-4]<sup>+</sup></b> , Table 7)   |      |     |                                                                                                                                                                                                                            |                                |
| 698                                                                                               | 0.04 |     | $\alpha$ H-1 <sub>[L1(97)]</sub> → L <sub>[AP(89)+dV(10)]</sub> (54)<br>$\alpha$ H-2 <sub>[dV(70)]</sub> → L <sub>[AP(89)+dV(10)]</sub> (16)                                                                               | LLCT<br>MLCT                   |
| 666                                                                                               | 0.03 | 650 | $\alpha$ H-2 <sub>[dV(70)]</sub> → L <sub>[AP(89)+dV(10)]</sub> (32)<br>$\alpha$ H-2 <sub>[dV(70)]</sub> → L+1 <sub>[dV(43)+L1(56)]</sub> (14)<br>$\alpha$ H-1 <sub>[L1(97)]</sub> → L <sub>[AP(89)+dV(10)]</sub> (39)     | MLCT<br>MLCT+d-d<br>LLCT       |
| 633                                                                                               | 0.04 |     | $\alpha$ H-2 <sub>[dV(70)]</sub> → L <sub>[AP(89)+dV(10)]</sub> (23)<br>$\alpha$ H-2 <sub>[dV(70)]</sub> → L+1 <sub>[dV(43)+L1(56)]</sub> (36)<br>$\alpha$ H-2 <sub>[dV(70)]</sub> → L+2 <sub>[dV(80)]</sub> (19)          | MLCT<br>d-d +MLCT<br>d-d       |

|                                                                                       |      |                   |                                                                      |           |
|---------------------------------------------------------------------------------------|------|-------------------|----------------------------------------------------------------------|-----------|
| 488                                                                                   | 0.02 |                   | $\alpha$ H-3 <sub>[AP(90)]</sub> → L <sub>[AP(89)+dV(10)]</sub> (52) | ILCT      |
|                                                                                       |      |                   | $\beta$ H-2 <sub>[AP(99)]</sub> → L <sub>[AP(93)]</sub> (30)         | ILCT      |
| 453                                                                                   | 0.08 |                   | $\alpha$ H <sub>[L1(95)]</sub> → L+1 <sub>[dV(43)+L1(56)]</sub> (40) | ILCT+LMCT |
|                                                                                       |      |                   | $\beta$ H <sub>[L1(93)]</sub> → L+1 <sub>[dV(73)+L1(25)]</sub> (38)  | LMCT      |
| [2] <sup>2+</sup> (corresponds to experimental data of [1-4] <sup>2+</sup> , Table 7) |      |                   |                                                                      |           |
| 867                                                                                   | 0.10 | 743 <sup>sh</sup> | H-1 <sub>[L1(89)]</sub> → L <sub>[AP(60)+dV(30)]</sub> (80)          | LLCT+LMCT |
| 678                                                                                   | 0.04 |                   | H-2 <sub>[AP(92)]</sub> → L <sub>[AP(60)+dV(30)]</sub> (79)          | ILCT+LMCT |
| 593                                                                                   | 0.03 | 562               | H-3 <sub>[L1(96)]</sub> → L <sub>[AP(60)+dV(30)]</sub> (20)          | LLCT+LMCT |
|                                                                                       |      |                   | H <sub>[L1(93)]</sub> → L+2 <sub>[dV(70)+L1(30)]</sub> (72)          | LMCT+ILCT |
| 532                                                                                   | 0.01 |                   | H-1 <sub>[L1(89)]</sub> → L+1 <sub>[AP(44)+dV(50)]</sub> (77)        | LLCT+LMCT |
| 472                                                                                   | 0.01 |                   | H-5 <sub>[AP(75)+L1(23)]</sub> → L <sub>[AP(60)+dV(30)]</sub> (60)   | ILCT+LMCT |
|                                                                                       |      |                   | H-4 <sub>[L1(60)+AP(37)]</sub> → L <sub>[AP(55)+dV(50)]</sub> (26)   | ILCT+LMCT |
| 447                                                                                   | 0.03 |                   | H-1 <sub>[L1(89)]</sub> → L+2 <sub>[dV(70)+L1(30)]</sub> (79)        | LMCT+ILCT |
| 432                                                                                   | 0.02 |                   | H-5 <sub>[AP(75)+L1(23)]</sub> → L <sub>[AP(60)+dV(30)]</sub> (22)   | ILCT+LMCT |
|                                                                                       |      |                   | H-4 <sub>[L1(60)+AP(37)]</sub> → L <sub>[AP(55)+dV(50)]</sub> (64)   | ILCT+LMCT |
| 423                                                                                   | 0.03 | 407               | H-2 <sub>[AP(92)]</sub> → L+1 <sub>[AP(44)+dV(50)]</sub> (82)        | ILCT+LMCT |

**Table S4** Gas phase optimized coordinates of **1** using B3LYP functionals (S = 0)

| S. No. | Symbol | X         | Y         | Z        | S. No. | Symbol | X         | Y         | Z         |
|--------|--------|-----------|-----------|----------|--------|--------|-----------|-----------|-----------|
| 1      | V1     | 13.342145 | 11.592321 | 7.037984 | 21     | C13    | 14.945964 | 10.114102 | 9.770557  |
| 2      | O1     | 12.819804 | 10.300811 | 6.252653 | 22     | C14    | 15.606279 | 9.414847  | 10.809623 |
| 3      | O2     | 13.812175 | 13.541875 | 7.713036 | 23     | C15    | 16.902498 | 8.963760  | 10.658246 |
| 4      | O3     | 15.095098 | 11.047131 | 7.560996 | 24     | C16    | 17.574884 | 9.214345  | 9.444424  |
| 5      | N1     | 13.718704 | 12.532123 | 5.436286 | 25     | C17    | 16.961014 | 9.902174  | 8.412922  |
| 6      | N2     | 11.366474 | 12.368887 | 7.349448 | 26     | C18    | 15.630470 | 10.374902 | 8.541819  |
| 7      | N3     | 11.601735 | 11.542964 | 9.484373 | 27     | H      | 13.645894 | 12.087637 | 4.523992  |
| 8      | N4     | 12.869954 | 11.167284 | 9.098865 | 28     | H      | 11.410194 | 11.634044 | 10.475542 |
| 9      | C1     | 14.087963 | 13.845671 | 5.436488 | 29     | H      | 14.370141 | 14.227310 | 3.320519  |
| 10     | C2     | 14.392139 | 14.652756 | 4.322069 | 30     | H      | 14.969943 | 16.617947 | 3.678529  |
| 11     | C3     | 14.725942 | 15.983450 | 4.525739 | 31     | H      | 15.017359 | 17.564868 | 5.969772  |
| 12     | C4     | 14.751877 | 16.519205 | 5.833280 | 32     | H      | 14.469247 | 16.155721 | 7.948219  |
| 13     | C5     | 14.447429 | 15.744241 | 6.943332 | 33     | H      | 11.120425 | 13.076747 | 5.432769  |
| 14     | C6     | 14.115303 | 14.379274 | 6.770077 | 34     | H      | 8.833598  | 14.005914 | 5.844585  |
| 15     | C7     | 10.639914 | 12.991818 | 6.399585 | 35     | H      | 7.851736  | 13.769130 | 8.154727  |
| 16     | C8     | 9.377032  | 13.507201 | 6.638827 | 36     | H      | 9.171529  | 12.595480 | 9.914405  |
| 17     | C9     | 8.837150  | 13.373583 | 7.926381 | 37     | H      | 13.176764 | 10.380387 | 10.974286 |
| 18     | C10    | 9.564847  | 12.729373 | 8.911563 | 38     | H      | 15.068783 | 9.233630  | 11.738727 |
| 19     | C11    | 10.838433 | 12.232383 | 8.579334 | 39     | H      | 17.397136 | 8.424999  | 11.460275 |
| 20     | C12    | 13.606914 | 10.563408 | 9.983740 | 40     | H      | 18.595981 | 8.863628  | 9.315632  |
|        |        |           |           |          | 41     | H      | 17.476126 | 10.104669 | 7.479372  |

**Table S5** Gas phase optimized coordinates of **1** using B3PW91 functionals (S = 0)

| S. No. | Symbol | X         | Y         | Z        | S. No. | Symbol | X         | Y         | Z         |
|--------|--------|-----------|-----------|----------|--------|--------|-----------|-----------|-----------|
| 1      | V1     | 13.362993 | 11.605875 | 7.055303 | 21     | C13    | 14.945805 | 10.111731 | 9.773351  |
| 2      | O1     | 12.841868 | 10.318061 | 6.273778 | 22     | C14    | 15.595728 | 9.398966  | 10.806034 |
| 3      | O2     | 13.822273 | 13.536665 | 7.717915 | 23     | C15    | 16.884169 | 8.932074  | 10.650102 |
| 4      | O3     | 15.100809 | 11.054456 | 7.576827 | 24     | C16    | 17.557020 | 9.182131  | 9.439244  |
| 5      | N1     | 13.723440 | 12.532842 | 5.456561 | 25     | C17    | 16.952073 | 9.884223  | 8.414286  |
| 6      | N2     | 11.400905 | 12.372376 | 7.348428 | 26     | C18    | 15.629893 | 10.371117 | 8.547943  |
| 7      | N3     | 11.642820 | 11.601432 | 9.490088 | 27     | H      | 13.647538 | 12.082119 | 4.548759  |
| 8      | N4     | 12.889515 | 11.195621 | 9.105869 | 28     | H      | 11.426266 | 11.650687 | 10.477645 |
| 9      | C1     | 14.074685 | 13.849683 | 5.447983 | 29     | H      | 14.336404 | 14.231398 | 3.330810  |
| 10     | C2     | 14.358492 | 14.656833 | 4.332721 | 30     | H      | 14.903412 | 16.629145 | 3.684399  |
| 11     | C3     | 14.674377 | 15.991640 | 4.534002 | 31     | H      | 14.953208 | 17.576047 | 5.973292  |
| 12     | C4     | 14.701720 | 16.526420 | 5.837908 | 32     | H      | 14.440733 | 16.160353 | 7.954382  |
| 13     | C5     | 14.416728 | 15.747725 | 6.949627 | 33     | H      | 11.157830 | 13.036593 | 5.419211  |
| 14     | C6     | 14.104247 | 14.381661 | 6.777326 | 34     | H      | 8.868010  | 13.965783 | 5.807577  |
| 15     | C7     | 10.675608 | 12.971013 | 6.387168 | 35     | H      | 7.883477  | 13.771861 | 8.119125  |
| 16     | C8     | 9.411711  | 13.485421 | 6.613189 | 36     | H      | 9.203627  | 12.642208 | 9.903659  |
| 17     | C9     | 8.871273  | 13.375987 | 7.900200 | 37     | H      | 13.186948 | 10.408470 | 10.981680 |
| 18     | C10    | 9.598625  | 12.756209 | 8.898693 | 38     | H      | 15.057004 | 9.218992  | 11.735175 |
| 19     | C11    | 10.872673 | 12.259551 | 8.577655 | 39     | H      | 17.372732 | 8.381368  | 11.448155 |
| 20     | C12    | 13.617431 | 10.581683 | 9.989202 | 40     | H      | 18.573653 | 8.819165  | 9.306319  |
|        |        |           |           |          | 41     | H      | 17.469320 | 10.086455 | 7.481433  |

**Table S6** Gas phase optimized coordinates of **1** using PBE1PBE functionals (S = 0)

| S. No. | Symbol | X         | Y         | Z        | S. No. | Symbol | X         | Y         | Z         |
|--------|--------|-----------|-----------|----------|--------|--------|-----------|-----------|-----------|
| 1      | V1     | 13.380964 | 11.598800 | 7.058799 | 21     | C13    | 14.946963 | 10.104343 | 9.773405  |
| 2      | O1     | 12.863098 | 10.312099 | 6.284882 | 22     | C14    | 15.587845 | 9.386561  | 10.805216 |
| 3      | O2     | 13.830301 | 13.523740 | 7.722157 | 23     | C15    | 16.873773 | 8.916065  | 10.653846 |
| 4      | O3     | 15.113025 | 11.054645 | 7.586004 | 24     | C16    | 17.551668 | 9.169110  | 9.448431  |
| 5      | N1     | 13.727983 | 12.522865 | 5.465373 | 25     | C17    | 16.954703 | 9.876906  | 8.424961  |
| 6      | N2     | 11.427119 | 12.370660 | 7.342696 | 26     | C18    | 15.635161 | 10.366425 | 8.554200  |
| 7      | N3     | 11.655416 | 11.603093 | 9.482555 | 27     | H      | 13.647282 | 12.072594 | 4.558576  |
| 8      | N4     | 12.899235 | 11.195012 | 9.102929 | 28     | H      | 11.443845 | 11.669845 | 10.469369 |
| 9      | C1     | 14.058856 | 13.843862 | 5.454993 | 29     | H      | 14.294033 | 14.228750 | 3.337694  |
| 10     | C2     | 14.318743 | 14.654431 | 4.339148 | 30     | H      | 14.825992 | 16.634034 | 3.687639  |
| 11     | C3     | 14.615097 | 15.992318 | 4.538229 | 31     | H      | 14.881895 | 17.577903 | 5.975335  |
| 12     | C4     | 14.645997 | 16.524932 | 5.840910 | 32     | H      | 14.410460 | 16.153297 | 7.957814  |
| 13     | C5     | 14.383819 | 15.741772 | 6.953000 | 33     | H      | 11.201850 | 13.037091 | 5.414291  |
| 14     | C6     | 14.091328 | 14.372958 | 6.782401 | 34     | H      | 8.922442  | 13.991854 | 5.793290  |
| 15     | C7     | 10.714327 | 12.976707 | 6.379911 | 35     | H      | 7.928644  | 13.810310 | 8.099774  |
| 16     | C8     | 9.457311  | 13.505478 | 6.600723 | 36     | H      | 9.229901  | 12.668826 | 9.888805  |
| 17     | C9     | 8.912299  | 13.403086 | 7.884465 | 37     | H      | 13.186811 | 10.407096 | 10.976667 |
| 18     | C10    | 9.628432  | 12.777113 | 8.884909 | 38     | H      | 15.043506 | 9.205473  | 11.730576 |
| 19     | C11    | 10.895898 | 12.266862 | 8.568249 | 39     | H      | 17.356745 | 8.360454  | 11.451351 |
| 20     | C12    | 13.620556 | 10.579123 | 9.985554 | 40     | H      | 18.567386 | 8.803590  | 9.318427  |
|        |        |           |           |          | 41     | H      | 17.476378 | 10.081999 | 7.495495  |

**Table S7** Gas phase optimized coordinates of [I]<sup>+</sup> using B3LYP functionals (S = ½)

| S. No. | Symbol | X         | Y         | Z        | S. No. | Symbol | X         | Y         | Z         |
|--------|--------|-----------|-----------|----------|--------|--------|-----------|-----------|-----------|
| 1      | V1     | 13.147840 | 11.557672 | 7.126391 | 21     | C13    | 14.888314 | 10.164280 | 9.719469  |
| 2      | O1     | 12.694162 | 10.258936 | 6.348236 | 22     | C14    | 15.601314 | 9.434057  | 10.702961 |
| 3      | O2     | 13.708975 | 13.816954 | 7.736190 | 23     | C15    | 16.929444 | 9.104570  | 10.517502 |
| 4      | O3     | 14.948311 | 11.290067 | 7.592466 | 24     | C16    | 17.580195 | 9.512386  | 9.337528  |
| 5      | N1     | 13.671757 | 12.598768 | 5.429322 | 25     | C17    | 16.912115 | 10.237514 | 8.361450  |
| 6      | N2     | 11.215440 | 12.396702 | 7.451070 | 26     | C18    | 15.555372 | 10.575776 | 8.526189  |
| 7      | N3     | 11.453455 | 11.405061 | 9.514585 | 27     | H      | 13.658107 | 12.123489 | 4.525731  |
| 8      | N4     | 12.739133 | 11.108631 | 9.119750 | 28     | H      | 11.200638 | 11.297925 | 10.489933 |
| 9      | C1     | 14.165393 | 13.802491 | 5.424572 | 29     | H      | 14.669557 | 14.045712 | 3.306285  |
| 10     | C2     | 14.676820 | 14.520789 | 4.283356 | 30     | H      | 15.568560 | 16.326609 | 3.620241  |
| 11     | C3     | 15.170534 | 15.773778 | 4.465645 | 31     | H      | 15.602061 | 17.417736 | 5.839244  |
| 12     | C4     | 15.190701 | 16.414677 | 5.773683 | 32     | H      | 14.731373 | 16.271992 | 7.867609  |
| 13     | C5     | 14.718916 | 15.802253 | 6.890025 | 33     | H      | 10.946771 | 13.242101 | 5.582883  |
| 14     | C6     | 14.175513 | 14.461212 | 6.787103 | 34     | H      | 8.616525  | 14.010384 | 6.028299  |
| 15     | C7     | 10.466791 | 13.059367 | 6.537585 | 35     | H      | 7.605043  | 13.510943 | 8.281798  |
| 16     | C8     | 9.176781  | 13.480287 | 6.789459 | 36     | H      | 8.947969  | 12.262107 | 9.965125  |
| 17     | C9     | 8.617741  | 13.197241 | 8.048253 | 37     | H      | 13.118674 | 10.246730 | 10.949999 |
| 18     | C10    | 9.357533  | 12.508870 | 8.991083 | 38     | H      | 15.082931 | 9.129725  | 11.609134 |
| 19     | C11    | 10.666322 | 12.116475 | 8.652643 | 39     | H      | 17.466101 | 8.538775  | 11.271521 |
| 20     | C12    | 13.526132 | 10.505810 | 9.969107 | 40     | H      | 18.625214 | 9.256718  | 9.186519  |
|        |        |           |           |          | 41     | H      | 17.412512 | 10.556468 | 7.453084  |

**Table S8** Gas phase optimized coordinates of [I]<sup>2+</sup> using B3LYP functionals (S = 0)

| S. No. | Symbol | X         | Y         | Z        | S. No. | Symbol | X         | Y         | Z         |
|--------|--------|-----------|-----------|----------|--------|--------|-----------|-----------|-----------|
| 1      | V1     | 13.030325 | 11.444686 | 7.009957 | 21     | C13    | 14.931801 | 10.456743 | 9.704421  |
| 2      | O1     | 12.367780 | 10.360358 | 6.092750 | 22     | C14    | 15.775042 | 10.064165 | 10.75969  |
| 3      | O2     | 13.815896 | 13.464020 | 7.792653 | 23     | C15    | 17.079045 | 9.649578  | 10.500532 |
| 4      | O3     | 14.640714 | 10.735604 | 7.365601 | 24     | C16    | 17.552879 | 9.580979  | 9.177235  |
| 5      | N1     | 13.615946 | 12.571223 | 5.389283 | 25     | C17    | 16.734901 | 9.930852  | 8.109205  |
| 6      | N2     | 11.161966 | 12.322539 | 7.391820 | 26     | C18    | 15.436121 | 10.400332 | 8.370105  |
| 7      | N3     | 11.377815 | 11.280608 | 9.426196 | 27     | H      | 13.524432 | 12.186911 | 4.446304  |
| 8      | N4     | 12.674358 | 11.068385 | 9.038250 | 28     | H      | 11.145764 | 11.197719 | 10.41128  |
| 9      | C1     | 14.173529 | 13.741877 | 5.486188 | 29     | H      | 14.594453 | 14.226999 | 3.388699  |
| 10     | C2     | 14.673165 | 14.564490 | 4.418017 | 30     | H      | 15.643246 | 16.393309 | 3.959969  |
| 11     | C3     | 15.249192 | 15.752632 | 4.743400 | 31     | H      | 15.840105 | 17.182026 | 6.293878  |
| 12     | C4     | 15.369867 | 16.217030 | 6.127908 | 32     | H      | 15.005956 | 15.832608 | 8.212223  |
| 13     | C5     | 14.920734 | 15.492111 | 7.185947 | 33     | H      | 10.922828 | 13.193003 | 5.519790  |
| 14     | C6     | 14.288500 | 14.220448 | 6.928570 | 34     | H      | 8.615576  | 14.012928 | 5.970502  |
| 15     | C7     | 10.441383 | 13.018027 | 6.474209 | 35     | H      | 7.566850  | 13.484590 | 8.197562  |
| 16     | C8     | 9.159271  | 13.462568 | 6.729550 | 36     | H      | 8.865315  | 12.169758 | 9.872320  |
| 17     | C9     | 8.578091  | 13.160939 | 7.971870 | 37     | H      | 13.221072 | 10.726637 | 10.99311  |
| 18     | C10    | 9.293939  | 12.433192 | 8.911082 | 38     | H      | 15.399103 | 10.071261 | 11.778907 |
| 19     | C11    | 10.592894 | 12.031076 | 8.578551 | 39     | H      | 17.724993 | 9.357509  | 11.321830 |
| 20     | C12    | 13.558380 | 10.772926 | 9.955920 | 40     | H      | 18.564858 | 9.238412  | 8.985448  |
|        |        |           |           |          | 41     | H      | 17.078957 | 9.870980  | 7.082285  |

**Table S9** Gas phase optimized coordinates of [I]<sup>-</sup> using B3LYP functionals (S = ½)

| S. No. | Symbol | X         | Y         | Z        | S. No. | Symbol | X         | Y         | Z         |
|--------|--------|-----------|-----------|----------|--------|--------|-----------|-----------|-----------|
| 1      | V1     | 13.323338 | 11.412595 | 6.938019 | 21     | C13    | 14.983038 | 10.138519 | 9.710036  |
| 2      | O1     | 12.662235 | 10.083230 | 6.283753 | 22     | C14    | 15.658813 | 9.591510  | 10.827219 |
| 3      | O2     | 13.786222 | 13.308298 | 7.689710 | 23     | C15    | 16.957966 | 9.126788  | 10.749020 |
| 4      | O3     | 15.147031 | 10.718417 | 7.361206 | 24     | C16    | 17.627852 | 9.209932  | 9.509387  |
| 5      | N1     | 13.724202 | 12.450399 | 5.289788 | 25     | C17    | 17.005939 | 9.741786  | 8.398145  |
| 6      | N2     | 11.312332 | 12.312863 | 7.230858 | 26     | C18    | 15.660520 | 10.229801 | 8.435136  |
| 7      | N3     | 11.593952 | 11.489610 | 9.383013 | 27     | H      | 13.829552 | 12.057894 | 4.359548  |
| 8      | N4     | 12.861453 | 11.091735 | 9.003806 | 28     | H      | 11.467536 | 11.697036 | 10.368886 |
| 9      | C1     | 14.049071 | 13.776001 | 5.411558 | 29     | H      | 14.382083 | 14.339750 | 3.353676  |
| 10     | C2     | 14.356063 | 14.687296 | 4.387680 | 30     | H      | 14.857330 | 16.726369 | 3.880045  |
| 11     | C3     | 14.623265 | 16.032861 | 4.687174 | 31     | H      | 14.795201 | 17.524440 | 6.239415  |
| 12     | C4     | 14.587821 | 16.479922 | 6.009404 | 32     | H      | 14.274569 | 15.911987 | 8.086943  |
| 13     | C5     | 14.290694 | 15.582172 | 7.049283 | 33     | H      | 11.074423 | 13.038076 | 5.336136  |
| 14     | C6     | 14.035081 | 14.230288 | 6.778682 | 34     | H      | 8.889545  | 14.204628 | 5.850747  |
| 15     | C6     | 10.615868 | 13.005622 | 6.319708 | 35     | H      | 7.999972  | 14.049169 | 8.204036  |
| 16     | C8     | 9.417872  | 13.646784 | 6.616864 | 36     | H      | 9.290492  | 12.757089 | 9.904135  |
| 17     | C9     | 8.930269  | 13.559506 | 7.926434 | 37     | H      | 13.254464 | 10.527596 | 10.941551 |
| 18     | C10    | 9.644784  | 12.847368 | 8.880658 | 38     | H      | 15.122870 | 9.541190  | 11.775520 |
| 19     | C11    | 10.849603 | 12.237918 | 8.487666 | 39     | H      | 17.452749 | 8.709580  | 11.621970 |
| 20     | C12    | 13.639633 | 10.600055 | 9.915377 | 40     | H      | 18.653093 | 8.851696  | 9.427763  |
|        |        |           |           |          | 41     | H      | 17.518248 | 9.814261  | 7.443070  |

**Table S10** Gas phase optimized coordinates of [I] using B3LYP functionals (S = 1)

| S. No. | Symbol | X         | Y         | Z        | S. No. | Symbol | X         | Y         | Z         |
|--------|--------|-----------|-----------|----------|--------|--------|-----------|-----------|-----------|
| 1      | V1     | 13.176933 | 11.438365 | 7.020469 | 21     | C13    | 14.941354 | 10.202458 | 9.683957  |
| 2      | O1     | 12.565804 | 10.145249 | 6.308458 | 22     | C14    | 15.663393 | 9.614904  | 10.752514 |
| 3      | O2     | 13.688186 | 13.498310 | 7.732659 | 23     | C15    | 16.978255 | 9.221086  | 10.606473 |
| 4      | O3     | 15.004154 | 10.952847 | 7.384898 | 24     | C16    | 17.612209 | 9.418463  | 9.362948  |
| 5      | N1     | 13.650594 | 12.522112 | 5.310715 | 25     | C16    | 16.939983 | 9.994834  | 8.300750  |
| 6      | N2     | 11.210113 | 12.330404 | 7.322413 | 26     | C18    | 15.585893 | 10.404737 | 8.416022  |
| 7      | N3     | 11.511650 | 11.471277 | 9.452014 | 27     | H      | 13.722958 | 12.115019 | 4.381870  |
| 8      | N4     | 12.783293 | 11.112864 | 9.051202 | 28     | H      | 11.351778 | 11.586101 | 10.446833 |
| 9      | C1     | 14.113006 | 13.765644 | 5.430919 | 29     | H      | 14.617328 | 14.208095 | 3.363984  |
| 10     | C2     | 14.595269 | 14.598603 | 4.379217 | 30     | H      | 15.385046 | 16.512460 | 3.850509  |
| 11     | C3     | 15.021266 | 15.879082 | 4.655099 | 31     | H      | 15.339868 | 17.404018 | 6.167497  |
| 12     | C4     | 14.995245 | 16.389488 | 5.984993 | 32     | H      | 14.532573 | 15.990251 | 8.054972  |
| 13     | C5     | 14.547753 | 15.616331 | 7.035505 | 33     | H      | 10.911989 | 13.049734 | 5.422223  |
| 14     | C6     | 14.098129 | 14.282621 | 6.809046 | 34     | H      | 8.649409  | 14.018778 | 5.927709  |
| 15     | C7     | 10.462519 | 12.970430 | 6.406429 | 35     | H      | 7.748877  | 13.760711 | 8.266815  |
| 16     | C8     | 9.216264  | 13.503721 | 6.694857 | 36     | H      | 9.109400  | 12.548186 | 9.964435  |
| 17     | C9     | 8.721102  | 13.357082 | 7.998888 | 37     | H      | 13.219043 | 10.471513 | 10.955058 |
| 18     | C10    | 9.472883  | 12.689528 | 8.951242 | 38     | H      | 15.155947 | 9.474778  | 11.705434 |
| 19     | C11    | 10.729116 | 12.183363 | 8.569320 | 39     | H      | 17.515317 | 8.768804  | 11.434249 |
| 20     | C12    | 13.589957 | 10.602694 | 9.932886 | 40     | H      | 18.648459 | 9.114597  | 9.235101  |
|        |        |           |           |          | 41     | H      | 17.424724 | 10.152499 | 7.342439  |

**Table S11** Gas phase optimized coordinates of **2** using B3LYP functionals (S = 0)

| S. No. | Symbol | X        | Y        | Z         | S. No. | Symbol | X         | Y         | Z         |
|--------|--------|----------|----------|-----------|--------|--------|-----------|-----------|-----------|
| 1      | V1     | 2.197547 | 4.612116 | 4.896821  | 27     | C19    | -0.149604 | -0.523811 | 3.983547  |
| 2      | O1     | 0.856338 | 5.434179 | 5.184568  | 28     | C20    | -0.163896 | 0.213619  | 2.781628  |
| 3      | O2     | 4.176216 | 3.966804 | 4.482458  | 29     | C21    | 0.403992  | 1.472662  | 2.705465  |
| 4      | O3     | 1.568996 | 3.241819 | 3.720316  | 30     | C22    | 1.017442  | 2.066709  | 3.837971  |
| 5      | N1     | 2.825927 | 5.891704 | 3.645384  | 31     | H      | 2.250101  | 6.674948  | 3.344928  |
| 6      | N2     | 3.212241 | 5.388580 | 6.619535  | 32     | H      | 2.964198  | 2.605297  | 8.205487  |
| 7      | N3     | 2.709937 | 3.356386 | 7.574201  | 33     | H      | 4.044595  | 7.530614  | 1.795853  |
| 8      | N4     | 2.156570 | 3.025924 | 6.356832  | 34     | H      | 7.685959  | 5.225780  | 1.901212  |
| 9      | C1     | 4.073929 | 5.820545 | 3.100980  | 35     | H      | 6.710932  | 3.684173  | 3.552855  |
| 10     | C2     | 4.646607 | 6.704239 | 2.162119  | 36     | H      | 8.405231  | 8.689448  | 0.554698  |
| 11     | C3     | 5.947888 | 6.507100 | 1.712911  | 37     | H      | 8.627132  | 7.268074  | 1.585282  |
| 12     | C4     | 6.668100 | 5.398038 | 2.241264  | 38     | H      | 7.673714  | 8.638418  | 2.171806  |
| 13     | C5     | 6.134261 | 4.521848 | 3.171193  | 39     | H      | 4.790803  | 8.211727  | -0.240969 |
| 14     | C6     | 4.805927 | 4.705227 | 3.623563  | 40     | H      | 6.230218  | 9.205193  | -0.500364 |
| 15     | C7     | 6.624197 | 7.423859 | 0.678086  | 41     | H      | 5.424978  | 9.222551  | 1.074279  |
| 16     | C8     | 7.908666 | 8.038169 | 1.285093  | 42     | H      | 6.103396  | 6.166028  | -1.039067 |
| 17     | C9     | 5.708200 | 8.579457 | 0.232695  | 43     | H      | 7.678943  | 5.775881  | -0.335768 |
| 18     | C10    | 6.998061 | 6.598921 | -0.577168 | 44     | H      | 7.493552  | 7.234549  | -1.322074 |
| 19     | C11    | 3.749060 | 6.623490 | 6.689237  | 45     | H      | 3.637459  | 7.225337  | 5.795760  |
| 20     | C12    | 4.414311 | 7.090256 | 7.810582  | 46     | H      | 4.834207  | 8.089512  | 7.817522  |
| 21     | C13    | 4.534093 | 6.235759 | 8.916426  | 47     | H      | 5.053309  | 6.563273  | 9.812423  |
| 22     | C14    | 3.983557 | 4.967139 | 8.865534  | 48     | H      | 4.046070  | 4.285209  | 9.707804  |
| 23     | C15    | 3.320167 | 4.577247 | 7.687585  | 49     | H      | 1.650321  | 1.183607  | 7.118417  |
| 24     | C16    | 1.631160 | 1.841838 | 6.243036  | 50     | H      | 0.466590  | -0.521242 | 6.038457  |
| 25     | C17    | 1.025858 | 1.320637 | 5.059005  | 51     | H      | -0.597015 | -1.511745 | 4.028431  |
| 26     | C18    | 0.442606 | 0.030989 | 5.100623  | 52     | H      | -0.627355 | -0.214817 | 1.896220  |
|        |        |          |          |           | 53     | H      | 0.402312  | 2.041737  | 1.781318  |

**Table S12** Gas phase optimized coordinates of **2** using B3PW91 functionals (S = 0)

| S. No. | Symbol | X        | Y        | Z         | S. No. | Symbol | X         | Y         | Z         |
|--------|--------|----------|----------|-----------|--------|--------|-----------|-----------|-----------|
| 1      | V1     | 2.214093 | 4.586436 | 4.877000  | 27     | C19    | -0.182908 | -0.514399 | 4.013871  |
| 2      | O1     | 0.879029 | 5.407381 | 5.167709  | 28     | C20    | -0.199005 | 0.216296  | 2.810696  |
| 3      | O2     | 4.169136 | 3.952267 | 4.461277  | 29     | C21    | 0.382708  | 1.466441  | 2.722765  |
| 4      | O3     | 1.574427 | 3.221773 | 3.720358  | 30     | C22    | 1.011685  | 2.057292  | 3.845163  |
| 5      | N1     | 2.827451 | 5.866938 | 3.637270  | 31     | H      | 2.246209  | 6.647521  | 3.343958  |
| 6      | N2     | 3.220745 | 5.374569 | 6.575727  | 32     | H      | 2.972620  | 2.609135  | 8.193763  |
| 7      | N3     | 2.768205 | 3.343293 | 7.527662  | 33     | H      | 4.046106  | 7.527456  | 1.803389  |
| 8      | N4     | 2.186320 | 3.015638 | 6.336318  | 34     | H      | 7.691679  | 5.235094  | 1.915341  |
| 9      | C1     | 4.076162 | 5.808994 | 3.096720  | 35     | H      | 6.712417  | 3.679738  | 3.549939  |
| 10     | C2     | 4.647983 | 6.699784 | 2.169508  | 36     | H      | 8.400479  | 8.701009  | 0.596909  |
| 11     | C3     | 5.951877 | 6.509265 | 1.727457  | 37     | H      | 8.622726  | 7.271288  | 1.616221  |
| 12     | C4     | 6.670677 | 5.402440 | 2.250947  | 38     | H      | 7.663023  | 8.633785  | 2.211389  |
| 13     | C5     | 6.134706 | 4.518541 | 3.171333  | 39     | H      | 4.799196  | 8.215841  | -0.214388 |
| 14     | C6     | 4.806163 | 4.695811 | 3.614492  | 40     | H      | 6.236601  | 9.216036  | -0.459756 |
| 15     | C7     | 6.627720 | 7.431710 | 0.705490  | 41     | H      | 5.425018  | 9.219600  | 1.112024  |
| 16     | C8     | 7.902967 | 8.042169 | 1.320166  | 42     | H      | 6.114684  | 6.184767  | -1.015084 |
| 17     | C9     | 5.713279 | 8.583232 | 0.266644  | 43     | H      | 7.689740  | 5.796421  | -0.309332 |
| 18     | C10    | 7.006535 | 6.618558 | -0.548434 | 44     | H      | 7.502286  | 7.260147  | -1.288343 |
| 19     | C11    | 3.735576 | 6.615343 | 6.637208  | 45     | H      | 3.608366  | 7.211200  | 5.741262  |
| 20     | C12    | 4.396893 | 7.097912 | 7.752131  | 46     | H      | 4.799881  | 8.104385  | 7.752316  |
| 21     | C13    | 4.535622 | 6.251693 | 8.859170  | 47     | H      | 5.052782  | 6.591895  | 9.752036  |
| 22     | C14    | 4.008261 | 4.974966 | 8.816409  | 48     | H      | 4.087706  | 4.297764  | 9.661446  |
| 23     | C15    | 3.348289 | 4.570863 | 7.644007  | 49     | H      | 1.678562  | 1.181437  | 7.113956  |
| 24     | C16    | 1.649692 | 1.836909 | 6.236397  | 50     | H      | 0.453030  | -0.510665 | 6.061629  |
| 25     | C17    | 1.022901 | 1.317775 | 5.066290  | 51     | H      | -0.641978 | -1.496854 | 4.067919  |
| 26     | C18    | 0.426304 | 0.037786 | 5.121152  | 52     | H      | -0.675865 | -0.210465 | 1.931204  |
|        |        |          |          |           | 53     | H      | 0.379253  | 2.030808  | 1.795315  |

**Table S13** Gas phase optimized coordinates of [2]<sup>+</sup> using B3LYP functionals (S = ½)

| S. No. | Symbol | X        | Y        | Z         | S. No. | Symbol | X         | Y         | Z         |
|--------|--------|----------|----------|-----------|--------|--------|-----------|-----------|-----------|
| 1      | V1     | 2.228445 | 4.672467 | 5.167373  | 27     | C19    | 0.054547  | -0.318748 | 3.689933  |
| 2      | O1     | 0.866704 | 5.451115 | 5.369289  | 28     | C20    | 0.250114  | 0.447736  | 2.524955  |
| 3      | O2     | 4.520919 | 4.078474 | 4.668741  | 29     | C21    | 0.869299  | 1.687729  | 2.575816  |
| 4      | O3     | 1.920620 | 3.391720 | 3.817822  | 30     | C22    | 1.311762  | 2.218802  | 3.803670  |
| 5      | N1     | 2.996436 | 6.013452 | 3.793259  | 31     | H      | 2.403068  | 6.768617  | 3.447173  |
| 6      | N2     | 3.236111 | 5.374125 | 6.912183  | 32     | H      | 2.570537  | 2.613218  | 8.454780  |
| 7      | N3     | 2.526058 | 3.359127 | 7.770422  | 33     | H      | 4.035801  | 7.531080  | 1.788595  |
| 8      | N4     | 2.095508 | 3.072341 | 6.493945  | 34     | H      | 7.657674  | 5.175153  | 1.676240  |
| 9      | C1     | 4.150496 | 5.893257 | 3.205293  | 35     | H      | 6.887598  | 3.715090  | 3.494595  |
| 10     | C2     | 4.662061 | 6.720527 | 2.145154  | 36     | H      | 8.267292  | 8.509580  | 0.131453  |
| 11     | C3     | 5.889958 | 6.474854 | 1.600980  | 37     | H      | 8.567247  | 7.158725  | 1.225477  |
| 12     | C4     | 6.686300 | 5.351929 | 2.125677  | 38     | H      | 7.678964  | 8.581416  | 1.801629  |
| 13     | C5     | 6.279716 | 4.535278 | 3.127571  | 39     | H      | 4.600099  | 8.069902  | -0.358233 |
| 14     | C6     | 4.984675 | 4.751367 | 3.740570  | 40     | H      | 6.031540  | 9.004481  | -0.792078 |
| 15     | C7     | 6.489065 | 7.303005 | 0.464871  | 41     | H      | 5.359786  | 9.153872  | 0.832415  |
| 16     | C8     | 7.830582 | 7.918073 | 0.943113  | 42     | H      | 5.812953  | 5.933132  | -1.116483 |
| 17     | C9     | 5.557641 | 8.445084 | 0.020164  | 43     | H      | 7.441814  | 5.560811  | -0.522660 |
| 18     | C10    | 6.746305 | 6.375005 | -0.751429 | 44     | H      | 7.185625  | 6.960119  | -1.566368 |
| 19     | C11    | 3.814186 | 6.587841 | 7.070597  | 45     | H      | 3.830766  | 7.215802  | 6.186962  |
| 20     | C12    | 4.350268 | 7.012046 | 8.269861  | 46     | H      | 4.805704  | 7.992133  | 8.349104  |
| 21     | C13    | 4.281377 | 6.143715 | 9.373518  | 47     | H      | 4.690385  | 6.443187  | 10.333531 |
| 22     | C14    | 3.682510 | 4.905308 | 9.239412  | 48     | H      | 3.600768  | 4.220123  | 10.076847 |
| 23     | C15    | 3.161522 | 4.551298 | 7.980442  | 49     | H      | 1.478878  | 1.204660  | 7.101761  |
| 24     | C16    | 1.571297 | 1.899610 | 6.262666  | 50     | H      | 0.348680  | -0.400868 | 5.812915  |
| 25     | C17    | 1.114932 | 1.446574 | 4.989452  | 51     | H      | -0.430821 | -1.287259 | 3.633787  |
| 26     | C18    | 0.488682 | 0.177732 | 4.902794  | 52     | H      | -0.088623 | 0.062351  | 1.567285  |
|        |        |          |          |           | 53     | H      | 1.024187  | 2.278855  | 1.679176  |

**Table S14** Gas phase optimized coordinates of [2]<sup>2+</sup> using B3LYP functionals (S = 0)

| S. No. | Symbol | X        | Y        | Z         | S. No. | Symbol | X         | Y         | Z         |
|--------|--------|----------|----------|-----------|--------|--------|-----------|-----------|-----------|
| 1      | V1     | 2.084154 | 4.825204 | 5.206456  | 27     | C19    | 0.640105  | -0.345032 | 3.463460  |
| 2      | O1     | 0.893263 | 5.785983 | 5.545895  | 28     | C20    | 0.331423  | 0.584082  | 2.455164  |
| 3      | O2     | 4.165291 | 3.994963 | 4.57662   | 29     | C21    | 0.554820  | 1.944884  | 2.644723  |
| 4      | O3     | 1.351458 | 3.673991 | 4.049798  | 30     | C22    | 1.133689  | 2.378054  | 3.846199  |
| 5      | N1     | 2.894299 | 6.121302 | 3.864345  | 31     | H      | 2.368473  | 6.954215  | 3.594031  |
| 6      | N2     | 3.148784 | 5.462386 | 6.901582  | 32     | H      | 2.582651  | 2.683639  | 8.428964  |
| 7      | N3     | 2.468900 | 3.451398 | 7.774587  | 33     | H      | 4.076196  | 7.631451  | 1.908008  |
| 8      | N4     | 2.094331 | 3.163726 | 6.485849  | 34     | H      | 7.412989  | 4.880718  | 1.630671  |
| 9      | C1     | 4.023352 | 5.921292 | 3.233842  | 35     | H      | 6.487216  | 3.403886  | 3.368155  |
| 10     | C2     | 4.600714 | 6.735460 | 2.219789  | 36     | H      | 8.362016  | 8.189612  | 0.256640  |
| 11     | C3     | 5.793613 | 6.372452 | 1.641228  | 37     | H      | 8.524708  | 6.783945  | 1.307609  |
| 12     | C4     | 6.468003 | 5.133200 | 2.098321  | 38     | H      | 7.785713  | 8.275157  | 1.930020  |
| 13     | C5     | 5.975580 | 4.306926 | 3.052575  | 39     | H      | 4.671525  | 8.165852  | -0.248785 |
| 14     | C6     | 4.723750 | 4.650382 | 3.685137  | 40     | H      | 6.193603  | 8.957238  | -0.648223 |
| 15     | C7     | 6.467254 | 7.175668 | 0.545205  | 41     | H      | 5.541582  | 9.122875  | 0.979305  |
| 16     | C8     | 7.870192 | 7.623742 | 1.054215  | 42     | H      | 5.670533  | 5.929149  | -1.091051 |
| 17     | C9     | 5.661605 | 8.423579 | 0.144150  | 43     | H      | 7.260718  | 5.383367  | -0.516366 |
| 18     | C10    | 6.639120 | 6.264127 | -0.706146 | 44     | H      | 7.132969  | 6.845466  | -1.491231 |
| 19     | C11    | 3.715984 | 6.690818 | 7.030408  | 45     | H      | 3.684559  | 7.325098  | 6.153293  |
| 20     | C12    | 4.287389 | 7.117155 | 8.211802  | 46     | H      | 4.728661  | 8.105021  | 8.274616  |
| 21     | C13    | 4.259655 | 6.256203 | 9.321870  | 47     | H      | 4.691340  | 6.566931  | 10.268109 |
| 22     | C14    | 3.665292 | 5.009141 | 9.213129  | 48     | H      | 3.611306  | 4.329744  | 10.057256 |
| 23     | C15    | 3.115417 | 4.648098 | 7.976069  | 49     | H      | 2.042204  | 1.157255  | 6.936869  |
| 24     | C16    | 1.888864 | 1.913650 | 6.164688  | 50     | H      | 1.370383  | -0.625833 | 5.468864  |
| 25     | C17    | 1.436847 | 1.454413 | 4.886279  | 51     | H      | 0.445428  | -1.400514 | 3.305733  |
| 26     | C18    | 1.171084 | 0.088248 | 4.674685  | 52     | H      | -0.099232 | 0.240132  | 1.519986  |
|        |        |          |          |           | 53     | H      | 0.308226  | 2.675105  | 1.881594  |

**Table S15** Gas phase optimized coordinates of [2]<sup>-</sup> using B3LYP functionals (S = ½)

| S. No. | Symbol | X        | Y         | Z         | S. No. | Symbol | X         | Y         | Z         |
|--------|--------|----------|-----------|-----------|--------|--------|-----------|-----------|-----------|
| 1      | V1     | 1.974407 | 4.684707  | 4.884558  | 27     | C19    | 0.017947  | -0.635625 | 3.983483  |
| 2      | O1     | 0.635353 | 5.441354  | 5.398246  | 28     | C20    | -0.205190 | 0.111907  | 2.807166  |
| 3      | O2     | 3.914160 | 3.999812  | 4.479538  | 29     | C21    | 0.184116  | 1.432955  | 2.718349  |
| 4      | O3     | 1.166213 | 3.346342  | 3.645507  | 30     | C22    | 0.824109  | 2.115369  | 3.801636  |
| 5      | N1     | 2.640045 | 6.014761  | 3.563250  | 31     | H      | 2.075176  | 6.726527  | 3.110651  |
| 6      | N2     | 3.142496 | 5.519581  | 6.580463  | 32     | H      | 3.108365  | 2.668153  | 8.035128  |
| 7      | N3     | 2.705883 | 3.436133  | 7.506815  | 33     | H      | 4.018923  | 7.548856  | 1.748801  |
| 8      | N4     | 2.095606 | 3.097492  | 6.314259  | 34     | H      | 7.622837  | 5.193505  | 2.111980  |
| 9      | C1     | 3.918653 | 5.883951  | 3.089839  | 35     | H      | 6.476513  | 3.702938  | 3.723456  |
| 10     | C2     | 4.578281 | 6.715515  | 2.168510  | 36     | H      | 8.465593  | 8.638167  | 0.730112  |
| 11     | C3     | 5.918662 | 6.490752  | 1.796103  | 37     | H      | 8.605416  | 7.220253  | 1.788637  |
| 12     | C3     | 6.586779 | 5.400253  | 2.376283  | 38     | H      | 7.644815  | 8.609724  | 2.308207  |
| 13     | C4     | 5.948027 | 4.552575  | 3.293986  | 39     | H      | 4.886917  | 8.191371  | -0.235573 |
| 14     | C5     | 4.611098 | 4.760329  | 3.658067  | 40     | H      | 6.353739  | 9.166669  | -0.437264 |
| 15     | C6     | 6.657046 | 7.389075  | 0.783808  | 41     | H      | 5.465020  | 9.205296  | 1.097258  |
| 16     | C7     | 7.919424 | 7.999103  | 1.439804  | 42     | H      | 6.206402  | 6.121585  | -0.940552 |
| 17     | C8     | 5.785594 | 8.554125  | 0.275823  | 43     | H      | 7.737178  | 5.721170  | -0.154191 |
| 18     | C9     | 7.085132 | 6.551219  | -0.445386 | 44     | H      | 7.625735  | 7.167919  | -1.178980 |
| 19     | C10    | 3.732671 | 6.721981  | 6.618673  | 45     | H      | 3.526914  | 7.348654  | 5.756326  |
| 20     | C11    | 4.557902 | 7.121977  | 7.664296  | 46     | H      | 5.023300  | 8.102000  | 7.651765  |
| 21     | C12    | 4.775494 | 6.221610  | 8.714234  | 47     | H      | 5.417458  | 6.490831  | 9.549466  |
| 22     | C13    | 4.172118 | 4.971395  | 8.684694  | 48     | H      | 4.318015  | 4.252097  | 9.486232  |
| 23     | C14    | 3.358929 | 4.654124  | 7.582270  | 49     | H      | 1.856045  | 1.172708  | 6.995725  |
| 24     | C15    | 1.691902 | 1.875259  | 6.167490  | 50     | H      | 0.823533  | -0.572837 | 5.968218  |
| 25     | C16    | 1.046200 | 1.340721  | 5.002674  | 51     | H      | -0.287973 | -1.676366 | 4.047626  |
| 26     | C18    | 0.637360 | -0.013698 | 5.050822  | 52     | H      | -0.689491 | -0.360940 | 1.954006  |
|        |        |          |           |           | 53     | H      | 0.021171  | 2.011687  | 1.813721  |

**Table S16** Gas phase optimized coordinates of 2 using B3LYP functionals (S = 1)

| S. No. | Symbol | X        | Y        | Z         | S. No. | Symbol | X         | Y         | Z         |
|--------|--------|----------|----------|-----------|--------|--------|-----------|-----------|-----------|
| 1      | V1     | 2.071507 | 4.728552 | 5.089588  | 27     | C19    | 0.174750  | -0.445143 | 3.719732  |
| 2      | O1     | 0.731240 | 5.494814 | 5.501470  | 28     | C20    | 0.111044  | 0.364166  | 2.567293  |
| 3      | O2     | 4.174106 | 4.086809 | 4.657554  | 29     | C21    | 0.555971  | 1.673317  | 2.586916  |
| 4      | O3     | 1.503786 | 3.493021 | 3.724391  | 30     | C22    | 1.088399  | 2.257271  | 3.766353  |
| 5      | N1     | 2.809888 | 6.119178 | 3.738045  | 31     | H      | 2.248681  | 6.852842  | 3.313362  |
| 6      | N2     | 3.161124 | 5.488428 | 6.819817  | 32     | H      | 2.929732  | 2.608625  | 8.231550  |
| 7      | N3     | 2.642752 | 3.390627 | 7.653205  | 33     | H      | 4.027319  | 7.545363  | 1.773686  |
| 8      | N4     | 2.120210 | 3.101701 | 6.408601  | 34     | H      | 7.584974  | 5.107599  | 1.890581  |
| 9      | C1     | 4.013570 | 5.929816 | 3.197559  | 35     | H      | 6.606585  | 3.694633  | 3.654971  |
| 10     | C2     | 4.608154 | 6.718068 | 2.169509  | 36     | H      | 8.368254  | 8.458708  | 0.337744  |
| 11     | C3     | 5.876579 | 6.444777 | 1.693340  | 37     | H      | 8.574551  | 7.092716  | 1.443209  |
| 12     | C4     | 6.588411 | 5.333250 | 2.259046  | 38     | H      | 7.689194  | 8.529374  | 1.976561  |
| 13     | C5     | 6.054763 | 4.536643 | 3.247194  | 39     | H      | 4.717595  | 8.076635  | -0.321962 |
| 14     | C6     | 4.749327 | 4.790194 | 3.756289  | 40     | H      | 6.184756  | 8.994101  | -0.684702 |
| 15     | C7     | 6.549045 | 7.272906 | 0.586740  | 41     | H      | 5.432554  | 9.137698  | 0.909472  |
| 16     | C8     | 7.874057 | 7.870091 | 1.120622  | 42     | H      | 5.928262  | 5.933487  | -1.033841 |
| 17     | C9     | 5.663052 | 8.435031 | 0.100463  | 43     | H      | 7.513786  | 5.529344  | -0.359688 |
| 18     | C10    | 6.851932 | 6.359846 | -0.626474 | 44     | H      | 7.342302  | 6.935000  | -1.421860 |
| 19     | C11    | 3.703838 | 6.710089 | 6.961886  | 45     | H      | 3.584126  | 7.366207  | 6.106213  |
| 20     | C12    | 4.379322 | 7.102707 | 8.106710  | 46     | H      | 4.807720  | 8.096024  | 8.177167  |
| 21     | C13    | 4.489355 | 6.180159 | 9.157378  | 47     | H      | 5.011005  | 6.447552  | 10.071902 |
| 22     | C14    | 3.926490 | 4.921120 | 9.031696  | 48     | H      | 3.984294  | 4.190919  | 9.833043  |
| 23     | C15    | 3.261636 | 4.608574 | 7.831465  | 49     | H      | 1.767535  | 1.161810  | 6.990296  |
| 24     | C16    | 1.697531 | 1.894735 | 6.179301  | 50     | H      | 0.754566  | -0.517104 | 5.781824  |
| 25     | C17    | 1.152087 | 1.430802 | 4.939848  | 51     | H      | -0.176159 | -1.471991 | 3.693292  |
| 26     | C18    | 0.692900 | 0.091458 | 4.881222  | 52     | H      | -0.293089 | -0.046893 | 1.645186  |
|        |        |          |          |           | 53     | H      | 0.512643  | 2.299361  | 1.701250  |



**Table S17** Gas phase optimized coordinates of **5** using B3LYP functionals (S = 0)

| S. No. | Symbol | X         | Y         | Z         | S. No. | Symbol | X         | Y         | Z         |
|--------|--------|-----------|-----------|-----------|--------|--------|-----------|-----------|-----------|
| 1      | V      | 13.327363 | 11.578844 | 6.977299  | 25     | C      | 17.089308 | 10.607303 | 8.626128  |
| 2      | O      | 12.871824 | 10.178437 | 6.315492  | 26     | C      | 15.697123 | 10.863286 | 8.671063  |
| 3      | O      | 13.434122 | 13.445103 | 7.480321  | 27     | H      | 13.559671 | 11.821274 | 4.471497  |
| 4      | O      | 15.065812 | 11.126567 | 7.556747  | 28     | H      | 11.272000 | 11.711468 | 10.382939 |
| 5      | N      | 13.596815 | 12.363586 | 5.330922  | 29     | H      | 15.736592 | 13.493395 | 4.037937  |
| 6      | N      | 11.175056 | 11.990450 | 7.179771  | 30     | H      | 15.509992 | 15.851141 | 3.699110  |
| 7      | N      | 11.511685 | 11.532251 | 9.413966  | 31     | H      | 13.846543 | 16.738659 | 5.093418  |
| 8      | N      | 12.830856 | 11.315599 | 9.103841  | 32     | H      | 15.160560 | 15.258732 | 7.440584  |
| 9      | C      | 13.894123 | 13.775976 | 5.168022  | 33     | H      | 10.838195 | 12.313214 | 5.179732  |
| 10     | C      | 15.390188 | 14.047276 | 4.919450  | 34     | H      | 8.422733  | 12.923586 | 5.473796  |
| 11     | C      | 15.653315 | 15.560841 | 4.747913  | 35     | H      | 7.468444  | 12.891783 | 7.807212  |
| 12     | C      | 14.737520 | 16.423220 | 5.655397  | 36     | H      | 8.940667  | 12.229920 | 9.706399  |
| 13     | C      | 14.287253 | 15.640562 | 6.897060  | 37     | H      | 13.239322 | 11.036127 | 11.100272 |
| 14     | C      | 13.411968 | 14.433750 | 6.501347  | 38     | H      | 15.292078 | 10.501278 | 12.062908 |
| 15     | C      | 10.368080 | 12.321081 | 6.155841  | 39     | H      | 17.729729 | 10.063175 | 11.934223 |
| 16     | C      | 9.033520  | 12.655591 | 6.328397  | 40     | H      | 18.868802 | 10.133880 | 9.713493  |
| 17     | C      | 8.508656  | 12.635136 | 7.628381  | 41     | H      | 17.573629 | 10.640343 | 7.655381  |
| 18     | C      | 9.320543  | 12.275496 | 8.690340  | 42     | H      | 13.737191 | 16.282611 | 7.595140  |
| 19     | C      | 10.663781 | 11.951957 | 8.419945  | 43     | H      | 15.253532 | 17.346629 | 5.944419  |
| 20     | C      | 13.643373 | 11.063766 | 10.081939 | 44     | H      | 16.706553 | 15.762664 | 4.979699  |
| 21     | C      | 15.048750 | 10.817927 | 9.943074  | 45     | H      | 15.947844 | 13.652208 | 5.775948  |
| 22     | C      | 15.804381 | 10.529517 | 11.102851 | 46     | H      | 12.375338 | 14.792340 | 6.340084  |
| 23     | C      | 17.163428 | 10.284627 | 11.035014 | 47     | H      | 13.326750 | 14.176438 | 4.310763  |
| 24     | C      | 17.800691 | 10.325849 | 9.780402  |        |        |           |           |           |

**Table S18** Gas phase optimized coordinates of **1<sup>t-NH</sup>** using B3LYP functionals (S = 0)

| S. No. | Symbol | X         | Y         | Z         | S. No. | Symbol | X         | Y         | Z         |
|--------|--------|-----------|-----------|-----------|--------|--------|-----------|-----------|-----------|
| 1      | V      | 13.515517 | 11.765475 | 7.181452  | 21     | C      | 16.995761 | 8.692787  | 10.409279 |
| 2      | O      | 13.033188 | 10.374663 | 6.551424  | 22     | C      | 17.651994 | 9.017575  | 9.204063  |
| 3      | O      | 15.302161 | 11.284880 | 7.650817  | 23     | C      | 17.077530 | 9.874871  | 8.282375  |
| 4      | N      | 11.514598 | 12.431897 | 7.543665  | 24     | C      | 15.801242 | 10.444003 | 8.516730  |
| 5      | N      | 11.971006 | 11.952195 | 9.747322  | 25     | H      | 11.618486 | 11.566191 | 10.618185 |
| 6      | N      | 13.142831 | 11.404999 | 9.257134  | 26     | H      | 13.620196 | 14.111861 | 3.311139  |
| 7      | C      | 13.829692 | 13.960090 | 5.448946  | 27     | H      | 14.105531 | 16.570119 | 3.294662  |
| 8      | C      | 13.822210 | 14.657112 | 4.228594  | 28     | H      | 14.582376 | 17.757417 | 5.420899  |
| 9      | C      | 14.095601 | 16.017438 | 4.229707  | 29     | H      | 14.578754 | 16.553722 | 7.583966  |
| 10     | C      | 14.368734 | 16.691528 | 5.443986  | 30     | H      | 11.121937 | 12.874737 | 5.573330  |
| 11     | C      | 14.368208 | 16.025325 | 6.656618  | 31     | H      | 8.742637  | 13.556616 | 5.998303  |
| 12     | C      | 14.092391 | 14.630228 | 6.692494  | 32     | H      | 7.877033  | 13.440900 | 8.360770  |
| 13     | C      | 10.687357 | 12.850590 | 6.565535  | 33     | H      | 9.402721  | 12.657881 | 10.173433 |
| 14     | C      | 9.375205  | 13.223577 | 6.813150  | 34     | H      | 13.469906 | 10.479124 | 11.066016 |
| 15     | C      | 8.899803  | 13.157958 | 8.129571  | 35     | H      | 15.234287 | 9.008268  | 11.592628 |
| 16     | C      | 9.740044  | 12.723726 | 9.143697  | 36     | H      | 17.460765 | 8.021819  | 11.124656 |
| 17     | C      | 11.053244 | 12.364017 | 8.803169  | 37     | H      | 18.629006 | 8.589174  | 8.994352  |
| 18     | C      | 13.859318 | 10.675699 | 10.061011 | 38     | H      | 17.580434 | 10.134946 | 7.356554  |
| 19     | C      | 15.132283 | 10.110902 | 9.737558  | 39     | N      | 14.030002 | 13.796552 | 7.739793  |
| 20     | C      | 15.755163 | 9.242171  | 10.665878 | 40     | H      | 14.234308 | 14.238107 | 8.634658  |
|        |        |           |           |           | 41     | O      | 13.595962 | 12.662589 | 5.548037  |
